# Supplementary material for: Quantitative global lipidomics analysis of patients with ovarian cancer versus benign adnexal mass
Source: PubMed Central journal article supplement (PMC8438087; doi:10.1038/s41598-021-97433-x), 2021-09-13

## **SUPPLEMENTAL MATERIAL**

**Table S1.** Histologic classifications of malignant and benign tumors in FH and RP cohorts.

**Table S2.** Lipid species retained for analysis in both patient cohorts.

**Table S3.** Plasma concentrations ( $\mu\text{M}$ ) for representative lipid species by class.

**Table S4.** Selected top differential metabolites by case status.

**Table S5.** Selected top differential metabolites by case status in stage-stratified analyses.

**Table S6.** Performance characteristics for selected lipid species (Table 2) using data from FH cohort.

**Table S7.** Patient and tumor characteristics (GEO samples).

**Table S8.** Lipid transport-related GO gene sets selected and individual genes available for analysis.

**Figure S1.** Lipid class assignments for 546 analyzed lipid species.

**Figure S2.** Distributions of coefficients of variation (CV) calculated for 546 analyzed lipid species.

**Figure S3.** Lipid class differences in cases versus controls.

**Figure S4.** Plasma CA125 values (U / mL) for cases and controls.

**Figure S5.** ROC curves and performance metrics for base models comprised of CA125, age, and BMI.

**Figure S6.** Spearman correlation analysis of lipid concentrations in paired ascites and plasma.

**Figure S7.** Schematic summary.

**Table S1. Histologic classifications of malignant and benign tumors in FH and RP cohorts.**

| FRED HUTCH                                  |    |      |                                |    |      |
|---------------------------------------------|----|------|--------------------------------|----|------|
| Cases [50]                                  |    |      | Controls [50]                  |    |      |
|                                             | n  | %    |                                | n  | %    |
| <b>SEROUS [50]</b>                          |    |      | <b>SEROUS [50]</b>             |    |      |
| Serous carcinoma                            | 47 | 94.0 | Serous cystadenofibroma        | 19 | 38.0 |
| STIC lesion                                 | 1  | 2.0  | Serous cystadenoma             | 14 | 28.0 |
| Other                                       | 2  | 4.0  | Serous adenofibroma            | 4  | 8.0  |
|                                             |    |      | Other                          | 13 | 26.0 |
|                                             |    |      |                                |    |      |
| ROSWELL PARK                                |    |      |                                |    |      |
| Cases [60]                                  |    |      | Controls [58]                  |    |      |
|                                             | n  | %    |                                | n  | %    |
| <b>SEROUS [32]</b>                          |    |      | <b>SEROUS [19]</b>             |    |      |
| Cystadenofibroma, malignant serous          | 1  | 3.1  | Serous adenoma                 | 1  | 5.3  |
| Papillary serous adenocarcinoma             | 4  | 12.5 | Serous cyst                    | 3  | 15.8 |
| Papillary serous cystadenocarcinoma         | 1  | 3.1  | Serous cystadenofibroma        | 4  | 21.1 |
| Serous adenocarcinoma, NOS                  | 4  | 12.5 | Serous cystadenoma             | 11 | 57.9 |
| Serous carcinoma, NOS                       | 13 | 40.6 |                                |    |      |
| Serous cystadenocarcinoma, NOS              | 7  | 21.9 |                                |    |      |
| Serous surface papillary carcinoma          | 2  | 6.3  |                                |    |      |
| <b>NON-SEROUS [28]</b>                      |    |      | <b>NON-SEROUS [39]</b>         |    |      |
| Carcinosarcoma, NOS                         | 2  | 7.1  | Benign Teratoma                | 1  | 2.6  |
| Clear cell adenocarcinoma, NOS              | 1  | 3.6  | Brenner Tumor                  | 1  | 2.6  |
| Clear cell carcinoma                        | 1  | 3.6  | Complex Cyst                   | 1  | 2.6  |
| Endometrioid adenocarcinoma, NOS            | 3  | 10.7 | Corpus Luteum Cyst             | 1  | 2.6  |
| Leiomyosarcoma, NOS                         | 1  | 3.6  | Cyst                           | 2  | 5.1  |
| Lymphoma, malig, large B-cell, diffuse, NOS | 1  | 3.6  | Cystadenoma                    | 5  | 12.8 |
| Malignant melanoma, NOS                     | 1  | 3.6  | Endometriosis of Ovary         | 1  | 2.6  |
| Mixed cell adenocarcinoma                   | 5  | 17.9 | Endometrioid cystadenofibroma  | 1  | 2.6  |
| Mucinous adenocarcinoma                     | 6  | 21.4 | Endosalpingiosis               | 1  | 2.6  |
| Mucinous carcinoma                          | 1  | 3.6  | Epithelial inclusion cyst      | 1  | 2.6  |
| Mucinous cystadenocarcinoma, NOS            | 3  | 10.7 | Fibroma                        | 2  | 5.1  |
| Mullerian mixed tumor                       | 1  | 3.6  | Fibrothecoma                   | 1  | 2.6  |
| Papillary adenocarcinoma, NOS               | 1  | 3.6  | Follicular Cyst                | 2  | 5.1  |
| Yolk sac tumor                              | 1  | 3.6  | Hemorrhagic Corpus Luteal Cyst | 2  | 5.1  |
|                                             |    |      | Hemorrhagic Cyst               | 1  | 2.6  |
|                                             |    |      | Hydrosalpinx                   | 1  | 2.6  |
|                                             |    |      | Mature Cystic Teratoma         | 2  | 5.1  |
|                                             |    |      | Mesothelial Inclusion Cyst     | 1  | 2.6  |
|                                             |    |      | Mucinous Adenoma               | 2  | 5.1  |
|                                             |    |      | Mucinous Cystadenoma           | 7  | 18.0 |
|                                             |    |      | Simple Cyst                    | 2  | 5.1  |
|                                             |    |      | Struma Ovarii                  | 1  | 2.6  |

**Table S2. Lipid species retained for analysis in both patient cohorts.**

|    | <u>Metabolite</u> | <u>Class</u> |     | <u>Metabolite</u> | <u>Class</u> |     | <u>Metabolite</u> | <u>Class</u> |
|----|-------------------|--------------|-----|-------------------|--------------|-----|-------------------|--------------|
| 1  | CE(12:0)          | CE           | 76  | PC(16:0/20:5)     | PC           | 151 | TAG46:1-FA16:1    | TAG          |
| 2  | CE(14:0)          | CE           | 77  | PC(16:0/22:4)     | PC           | 152 | TAG46:1-FA18:1    | TAG          |
| 3  | CE(14:1)          | CE           | 78  | PC(16:0/22:5)     | PC           | 153 | TAG46:2-FA12:0    | TAG          |
| 4  | CE(15:0)          | CE           | 79  | PC(16:0/22:6)     | PC           | 154 | TAG46:2-FA14:0    | TAG          |
| 5  | CE(16:1)          | CE           | 80  | PC(17:0/18:1)     | PC           | 155 | TAG46:2-FA14:1    | TAG          |
| 6  | CE(17:0)          | CE           | 81  | PC(17:0/18:2)     | PC           | 156 | TAG46:2-FA16:0    | TAG          |
| 7  | CE(18:0)          | CE           | 82  | PC(17:0/20:4)     | PC           | 157 | TAG46:2-FA16:1    | TAG          |
| 8  | CE(18:1)          | CE           | 83  | PC(18:0/16:1)     | PC           | 158 | TAG46:2-FA18:1    | TAG          |
| 9  | CE(18:2)          | CE           | 84  | PC(18:0/18:0)     | PC           | 159 | TAG46:2-FA18:2    | TAG          |
| 10 | CE(18:3)          | CE           | 85  | PC(18:0/18:1)     | PC           | 160 | TAG46:3-FA16:0    | TAG          |
| 11 | CE(18:4)          | CE           | 86  | PC(18:0/18:2)     | PC           | 161 | TAG46:3-FA16:1    | TAG          |
| 12 | CE(20:0)          | CE           | 87  | PC(18:0/18:3)     | PC           | 162 | TAG46:3-FA18:1    | TAG          |
| 13 | CE(20:1)          | CE           | 88  | PC(18:0/20:3)     | PC           | 163 | TAG46:3-FA18:2    | TAG          |
| 14 | CE(20:2)          | CE           | 89  | PC(18:0/20:4)     | PC           | 164 | TAG46:4-FA18:2    | TAG          |
| 15 | CE(20:3)          | CE           | 90  | PC(18:0/20:5)     | PC           | 165 | TAG47:0-FA15:0    | TAG          |
| 16 | CE(20:5)          | CE           | 91  | PC(18:0/22:4)     | PC           | 166 | TAG47:0-FA16:0    | TAG          |
| 17 | CE(22:2)          | CE           | 92  | PC(18:0/22:5)     | PC           | 167 | TAG47:1-FA15:0    | TAG          |
| 18 | CE(22:4)          | CE           | 93  | PC(18:0/22:6)     | PC           | 168 | TAG47:1-FA16:0    | TAG          |
| 19 | CE(22:5)          | CE           | 94  | PC(18:1/16:1)     | PC           | 169 | TAG47:1-FA16:1    | TAG          |
| 20 | CE(22:6)          | CE           | 95  | PC(18:1/18:1)     | PC           | 170 | TAG47:1-FA18:1    | TAG          |
| 21 | CER(18:0)         | CER          | 96  | PC(18:1/18:2)     | PC           | 171 | TAG47:2-FA18:1    | TAG          |
| 22 | CER(24:0)         | CER          | 97  | PC(18:1/18:3)     | PC           | 172 | TAG47:2-FA18:2    | TAG          |
| 23 | CER(24:1)         | CER          | 98  | PC(18:1/20:2)     | PC           | 173 | TAG48:0-FA14:0    | TAG          |
| 24 | HCER(22:0)        | CER          | 99  | PC(18:1/20:3)     | PC           | 174 | TAG48:0-FA16:0    | TAG          |
| 25 | HCER(24:0)        | CER          | 100 | PC(18:1/20:4)     | PC           | 175 | TAG48:0-FA18:0    | TAG          |
| 26 | LCER(24:1)        | CER          | 101 | PC(18:1/20:5)     | PC           | 176 | TAG48:1-FA12:0    | TAG          |
| 27 | DAG(14:0/18:1)    | DAG          | 102 | PC(18:1/22:5)     | PC           | 177 | TAG48:1-FA14:0    | TAG          |
| 28 | DAG(14:1/18:1)    | DAG          | 103 | PC(18:1/22:6)     | PC           | 178 | TAG48:1-FA14:1    | TAG          |
| 29 | DAG(16:0/16:0)    | DAG          | 104 | PC(18:2/16:1)     | PC           | 179 | TAG48:1-FA16:0    | TAG          |
| 30 | DAG(16:0/16:1)    | DAG          | 105 | PC(18:2/18:2)     | PC           | 180 | TAG48:1-FA16:1    | TAG          |
| 31 | DAG(16:0/18:1)    | DAG          | 106 | PC(18:2/20:3)     | PC           | 181 | TAG48:1-FA18:0    | TAG          |
| 32 | DAG(16:0/18:2)    | DAG          | 107 | PC(18:2/20:4)     | PC           | 182 | TAG48:1-FA18:1    | TAG          |
| 33 | DAG(16:1/18:1)    | DAG          | 108 | PE(16:0/18:1)     | PE           | 183 | TAG48:2-FA12:0    | TAG          |
| 34 | DAG(16:1/18:2)    | DAG          | 109 | PE(16:0/18:2)     | PE           | 184 | TAG48:2-FA14:0    | TAG          |
| 35 | DAG(18:0/18:1)    | DAG          | 110 | PE(16:0/20:4)     | PE           | 185 | TAG48:2-FA14:1    | TAG          |
| 36 | DAG(18:0/18:2)    | DAG          | 111 | PE(16:0/22:6)     | PE           | 186 | TAG48:2-FA16:0    | TAG          |
| 37 | DAG(18:1/18:1)    | DAG          | 112 | PE(18:0/18:0)     | PE           | 187 | TAG48:2-FA16:1    | TAG          |
| 38 | DAG(18:1/18:2)    | DAG          | 113 | PE(18:1/18:1)     | PE           | 188 | TAG48:2-FA18:0    | TAG          |
| 39 | DAG(18:1/20:3)    | DAG          | 114 | PE(18:1/18:2)     | PE           | 189 | TAG48:2-FA18:1    | TAG          |
| 40 | DAG(18:1/20:4)    | DAG          | 115 | PE(18:1/20:4)     | PE           | 190 | TAG48:2-FA18:2    | TAG          |
| 41 | DAG(18:1/22:6)    | DAG          | 116 | PE(18:2/16:1)     | PE           | 191 | TAG48:3-FA12:0    | TAG          |
| 42 | DAG(20:0/20:0)    | DAG          | 117 | PE(O-16:0/20:4)   | PE           | 192 | TAG48:3-FA14:0    | TAG          |
| 43 | FFA(17:0)         | FFA          | 118 | PE(P-16:0/18:2)   | PE           | 193 | TAG48:3-FA14:1    | TAG          |
| 44 | FFA(20:5)         | FFA          | 119 | PE(P-16:0/20:3)   | PE           | 194 | TAG48:3-FA16:0    | TAG          |
| 45 | FFA(22:6)         | FFA          | 120 | PE(P-16:0/22:6)   | PE           | 195 | TAG48:3-FA16:1    | TAG          |
| 46 | FFA(24:0)         | FFA          | 121 | PE(P-18:0/18:1)   | PE           | 196 | TAG48:3-FA18:1    | TAG          |
| 47 | LPC(15:0)         | LPC          | 122 | PE(P-18:0/18:2)   | PE           | 197 | TAG48:3-FA18:2    | TAG          |
| 48 | LPC(16:0)         | LPC          | 123 | PE(P-18:0/20:3)   | PE           | 198 | TAG48:3-FA18:3    | TAG          |
| 49 | LPC(17:0)         | LPC          | 124 | PE(P-18:0/22:6)   | PE           | 199 | TAG48:4-FA12:0    | TAG          |
| 50 | LPC(18:0)         | LPC          | 125 | PE(P-18:1/18:1)   | PE           | 200 | TAG48:4-FA14:0    | TAG          |
| 51 | LPC(18:1)         | LPC          | 126 | PE(P-18:1/18:2)   | PE           | 201 | TAG48:4-FA14:1    | TAG          |
| 52 | LPC(18:2)         | LPC          | 127 | PE(P-18:1/20:3)   | PE           | 202 | TAG48:4-FA16:0    | TAG          |
| 53 | LPC(20:2)         | LPC          | 128 | PE(P-18:1/20:4)   | PE           | 203 | TAG48:4-FA16:1    | TAG          |
| 54 | LPC(20:3)         | LPC          | 129 | PE(P-18:1/22:6)   | PE           | 204 | TAG48:4-FA18:1    | TAG          |
| 55 | LPC(20:4)         | LPC          | 130 | SM(14:0)          | SM           | 205 | TAG48:4-FA18:2    | TAG          |
| 56 | LPC(22:5)         | LPC          | 131 | SM(18:1)          | SM           | 206 | TAG48:4-FA18:3    | TAG          |
| 57 | LPC(22:6)         | LPC          | 132 | SM(20:1)          | SM           | 207 | TAG48:5-FA18:2    | TAG          |
| 58 | LPE(16:0)         | LPE          | 133 | SM(22:0)          | SM           | 208 | TAG49:0-FA15:0    | TAG          |
| 59 | LPE(18:0)         | LPE          | 134 | SM(22:1)          | SM           | 209 | TAG49:0-FA16:0    | TAG          |
| 60 | LPE(18:1)         | LPE          | 135 | SM(24:0)          | SM           | 210 | TAG49:0-FA17:0    | TAG          |
| 61 | PC(14:0/18:1)     | PC           | 136 | SM(24:1)          | SM           | 211 | TAG49:0-FA18:0    | TAG          |
| 62 | PC(14:0/18:2)     | PC           | 137 | SM(26:0)          | SM           | 212 | TAG49:1-FA14:0    | TAG          |
| 63 | PC(14:0/20:3)     | PC           | 138 | SM(26:1)          | SM           | 213 | TAG49:1-FA15:0    | TAG          |
| 64 | PC(14:0/20:4)     | PC           | 139 | TAG44:0-FA16:0    | TAG          | 214 | TAG49:1-FA16:0    | TAG          |
| 65 | PC(15:0/18:1)     | PC           | 140 | TAG44:1-FA16:0    | TAG          | 215 | TAG49:1-FA16:1    | TAG          |
| 66 | PC(15:0/18:2)     | PC           | 141 | TAG44:1-FA18:1    | TAG          | 216 | TAG49:1-FA17:0    | TAG          |
| 67 | PC(16:0/14:0)     | PC           | 142 | TAG44:2-FA16:0    | TAG          | 217 | TAG49:1-FA18:1    | TAG          |
| 68 | PC(16:0/16:1)     | PC           | 143 | TAG44:2-FA18:2    | TAG          | 218 | TAG49:2-FA14:0    | TAG          |
| 69 | PC(16:0/18:0)     | PC           | 144 | TAG45:1-FA16:0    | TAG          | 219 | TAG49:2-FA15:0    | TAG          |
| 70 | PC(16:0/18:1)     | PC           | 145 | TAG46:0-FA14:0    | TAG          | 220 | TAG49:2-FA16:0    | TAG          |
| 71 | PC(16:0/18:2)     | PC           | 146 | TAG46:0-FA16:0    | TAG          | 221 | TAG49:2-FA16:1    | TAG          |
| 72 | PC(16:0/18:3)     | PC           | 147 | TAG46:1-FA12:0    | TAG          | 222 | TAG49:2-FA17:0    | TAG          |
| 73 | PC(16:0/20:2)     | PC           | 148 | TAG46:1-FA14:0    | TAG          | 223 | TAG49:2-FA18:1    | TAG          |
| 74 | PC(16:0/20:3)     | PC           | 149 | TAG46:1-FA14:1    | TAG          | 224 | TAG49:2-FA18:2    | TAG          |
| 75 | PC(16:0/20:4)     | PC           | 150 | TAG46:1-FA16:0    | TAG          | 225 | TAG49:3-FA15:0    | TAG          |

| <b>Metabolite</b> | <b>Class</b>   | <b>Metabolite</b> | <b>Class</b> | <b>Metabolite</b> | <b>Class</b> |     |                |     |
|-------------------|----------------|-------------------|--------------|-------------------|--------------|-----|----------------|-----|
| 226               | TAG49:3-FA16:0 | TAG               | 301          | TAG52:2-FA18:0    | TAG          | 376 | TAG54:2-FA16:0 | TAG |
| 227               | TAG49:3-FA16:1 | TAG               | 302          | TAG52:2-FA18:1    | TAG          | 377 | TAG54:2-FA18:0 | TAG |
| 228               | TAG49:3-FA18:2 | TAG               | 303          | TAG52:2-FA18:2    | TAG          | 378 | TAG54:2-FA18:1 | TAG |
| 229               | TAG49:3-FA18:3 | TAG               | 304          | TAG52:2-FA20:0    | TAG          | 379 | TAG54:2-FA18:2 | TAG |
| 230               | TAG50:0-FA14:0 | TAG               | 305          | TAG52:2-FA20:1    | TAG          | 380 | TAG54:2-FA20:0 | TAG |
| 231               | TAG50:0-FA16:0 | TAG               | 306          | TAG52:2-FA20:2    | TAG          | 381 | TAG54:2-FA20:1 | TAG |
| 232               | TAG50:0-FA18:0 | TAG               | 307          | TAG52:3-FA14:0    | TAG          | 382 | TAG54:2-FA20:2 | TAG |
| 233               | TAG50:1-FA14:0 | TAG               | 308          | TAG52:3-FA16:0    | TAG          | 383 | TAG54:3-FA16:0 | TAG |
| 234               | TAG50:1-FA16:0 | TAG               | 309          | TAG52:3-FA16:1    | TAG          | 384 | TAG54:3-FA16:1 | TAG |
| 235               | TAG50:1-FA16:1 | TAG               | 310          | TAG52:3-FA18:0    | TAG          | 385 | TAG54:3-FA18:0 | TAG |
| 236               | TAG50:1-FA18:0 | TAG               | 311          | TAG52:3-FA18:1    | TAG          | 386 | TAG54:3-FA18:1 | TAG |
| 237               | TAG50:1-FA18:1 | TAG               | 312          | TAG52:3-FA18:2    | TAG          | 387 | TAG54:3-FA18:2 | TAG |
| 238               | TAG50:2-FA14:0 | TAG               | 313          | TAG52:3-FA18:3    | TAG          | 388 | TAG54:3-FA18:3 | TAG |
| 239               | TAG50:2-FA14:1 | TAG               | 314          | TAG52:3-FA20:0    | TAG          | 389 | TAG54:3-FA20:1 | TAG |
| 240               | TAG50:2-FA16:0 | TAG               | 315          | TAG52:3-FA20:1    | TAG          | 390 | TAG54:3-FA20:2 | TAG |
| 241               | TAG50:2-FA16:1 | TAG               | 316          | TAG52:3-FA20:2    | TAG          | 391 | TAG54:3-FA20:3 | TAG |
| 242               | TAG50:2-FA18:0 | TAG               | 317          | TAG52:3-FA20:3    | TAG          | 392 | TAG54:4-FA16:0 | TAG |
| 243               | TAG50:2-FA18:1 | TAG               | 318          | TAG52:3-FA22:1    | TAG          | 393 | TAG54:4-FA16:1 | TAG |
| 244               | TAG50:2-FA18:2 | TAG               | 319          | TAG52:4-FA14:0    | TAG          | 394 | TAG54:4-FA18:0 | TAG |
| 245               | TAG50:3-FA14:0 | TAG               | 320          | TAG52:4-FA16:0    | TAG          | 395 | TAG54:4-FA18:1 | TAG |
| 246               | TAG50:3-FA14:1 | TAG               | 321          | TAG52:4-FA18:0    | TAG          | 396 | TAG54:4-FA18:2 | TAG |
| 247               | TAG50:3-FA16:0 | TAG               | 322          | TAG52:4-FA18:1    | TAG          | 397 | TAG54:4-FA18:3 | TAG |
| 248               | TAG50:3-FA16:1 | TAG               | 323          | TAG52:4-FA18:2    | TAG          | 398 | TAG54:4-FA20:1 | TAG |
| 249               | TAG50:3-FA18:0 | TAG               | 324          | TAG52:4-FA18:3    | TAG          | 399 | TAG54:4-FA20:2 | TAG |
| 250               | TAG50:3-FA18:1 | TAG               | 325          | TAG52:4-FA20:0    | TAG          | 400 | TAG54:4-FA20:3 | TAG |
| 251               | TAG50:3-FA18:2 | TAG               | 326          | TAG52:4-FA20:2    | TAG          | 401 | TAG54:4-FA20:4 | TAG |
| 252               | TAG50:3-FA18:3 | TAG               | 327          | TAG52:4-FA20:3    | TAG          | 402 | TAG54:4-FA22:1 | TAG |
| 253               | TAG50:4-FA14:0 | TAG               | 328          | TAG52:4-FA20:4    | TAG          | 403 | TAG54:4-FA22:4 | TAG |
| 254               | TAG50:4-FA14:1 | TAG               | 329          | TAG52:4-FA22:1    | TAG          | 404 | TAG54:5-FA16:0 | TAG |
| 255               | TAG50:4-FA16:0 | TAG               | 330          | TAG52:4-FA22:4    | TAG          | 405 | TAG54:5-FA16:1 | TAG |
| 256               | TAG50:4-FA16:1 | TAG               | 331          | TAG52:5-FA14:0    | TAG          | 406 | TAG54:5-FA18:0 | TAG |
| 257               | TAG50:4-FA18:1 | TAG               | 332          | TAG52:5-FA16:0    | TAG          | 407 | TAG54:5-FA18:1 | TAG |
| 258               | TAG50:4-FA18:2 | TAG               | 333          | TAG52:5-FA18:2    | TAG          | 408 | TAG54:5-FA18:2 | TAG |
| 259               | TAG50:4-FA18:3 | TAG               | 334          | TAG52:5-FA18:3    | TAG          | 409 | TAG54:5-FA18:3 | TAG |
| 260               | TAG50:4-FA20:4 | TAG               | 335          | TAG52:5-FA20:3    | TAG          | 410 | TAG54:5-FA20:2 | TAG |
| 261               | TAG50:5-FA14:0 | TAG               | 336          | TAG52:5-FA20:4    | TAG          | 411 | TAG54:5-FA20:3 | TAG |
| 262               | TAG50:5-FA16:0 | TAG               | 337          | TAG52:5-FA20:5    | TAG          | 412 | TAG54:5-FA20:4 | TAG |
| 263               | TAG50:5-FA16:1 | TAG               | 338          | TAG52:5-FA22:5    | TAG          | 413 | TAG54:5-FA20:5 | TAG |
| 264               | TAG50:5-FA18:1 | TAG               | 339          | TAG52:6-FA14:0    | TAG          | 414 | TAG54:5-FA22:4 | TAG |
| 265               | TAG50:5-FA18:2 | TAG               | 340          | TAG52:6-FA16:0    | TAG          | 415 | TAG54:5-FA22:5 | TAG |
| 266               | TAG50:5-FA18:3 | TAG               | 341          | TAG52:6-FA18:1    | TAG          | 416 | TAG54:6-FA16:0 | TAG |
| 267               | TAG50:5-FA20:4 | TAG               | 342          | TAG52:6-FA18:2    | TAG          | 417 | TAG54:6-FA16:1 | TAG |
| 268               | TAG51:0-FA17:0 | TAG               | 343          | TAG52:6-FA18:3    | TAG          | 418 | TAG54:6-FA18:1 | TAG |
| 269               | TAG51:0-FA18:0 | TAG               | 344          | TAG52:6-FA20:4    | TAG          | 419 | TAG54:6-FA18:2 | TAG |
| 270               | TAG51:1-FA15:0 | TAG               | 345          | TAG52:6-FA20:5    | TAG          | 420 | TAG54:6-FA18:3 | TAG |
| 271               | TAG51:1-FA16:0 | TAG               | 346          | TAG52:6-FA22:6    | TAG          | 421 | TAG54:6-FA20:3 | TAG |
| 272               | TAG51:1-FA17:0 | TAG               | 347          | TAG52:7-FA18:1    | TAG          | 422 | TAG54:6-FA20:4 | TAG |
| 273               | TAG51:1-FA18:0 | TAG               | 348          | TAG52:7-FA20:5    | TAG          | 423 | TAG54:6-FA20:5 | TAG |
| 274               | TAG51:1-FA18:1 | TAG               | 349          | TAG52:7-FA22:6    | TAG          | 424 | TAG54:6-FA22:5 | TAG |
| 275               | TAG51:2-FA15:0 | TAG               | 350          | TAG52:8-FA16:1    | TAG          | 425 | TAG54:6-FA22:6 | TAG |
| 276               | TAG51:2-FA16:0 | TAG               | 351          | TAG52:8-FA18:2    | TAG          | 426 | TAG54:7-FA16:1 | TAG |
| 277               | TAG51:2-FA16:1 | TAG               | 352          | TAG53:0-FA16:0    | TAG          | 427 | TAG54:7-FA18:1 | TAG |
| 278               | TAG51:2-FA17:0 | TAG               | 353          | TAG53:1-FA16:0    | TAG          | 428 | TAG54:7-FA18:2 | TAG |
| 279               | TAG51:2-FA18:1 | TAG               | 354          | TAG53:1-FA17:0    | TAG          | 429 | TAG54:7-FA18:3 | TAG |
| 280               | TAG51:2-FA18:2 | TAG               | 355          | TAG53:1-FA18:0    | TAG          | 430 | TAG54:7-FA20:4 | TAG |
| 281               | TAG51:3-FA15:0 | TAG               | 356          | TAG53:1-FA18:1    | TAG          | 431 | TAG54:7-FA20:5 | TAG |
| 282               | TAG51:3-FA16:1 | TAG               | 357          | TAG53:2-FA16:0    | TAG          | 432 | TAG54:7-FA22:5 | TAG |
| 283               | TAG51:3-FA17:0 | TAG               | 358          | TAG53:2-FA17:0    | TAG          | 433 | TAG54:7-FA22:6 | TAG |
| 284               | TAG51:3-FA18:2 | TAG               | 359          | TAG53:2-FA18:1    | TAG          | 434 | TAG54:8-FA18:2 | TAG |
| 285               | TAG51:3-FA18:3 | TAG               | 360          | TAG53:2-FA18:2    | TAG          | 435 | TAG54:8-FA18:3 | TAG |
| 286               | TAG51:4-FA15:0 | TAG               | 361          | TAG53:3-FA16:0    | TAG          | 436 | TAG54:8-FA20:4 | TAG |
| 287               | TAG51:4-FA18:2 | TAG               | 362          | TAG53:3-FA17:0    | TAG          | 437 | TAG54:8-FA20:5 | TAG |
| 288               | TAG51:4-FA18:3 | TAG               | 363          | TAG53:3-FA18:2    | TAG          | 438 | TAG54:8-FA22:6 | TAG |
| 289               | TAG51:5-FA18:2 | TAG               | 364          | TAG53:4-FA16:0    | TAG          | 439 | TAG55:1-FA16:0 | TAG |
| 290               | TAG52:0-FA16:0 | TAG               | 365          | TAG53:4-FA17:0    | TAG          | 440 | TAG55:1-FA18:1 | TAG |
| 291               | TAG52:0-FA18:0 | TAG               | 366          | TAG53:4-FA18:2    | TAG          | 441 | TAG55:2-FA18:2 | TAG |
| 292               | TAG52:1-FA16:0 | TAG               | 367          | TAG53:4-FA18:3    | TAG          | 442 | TAG55:3-FA18:1 | TAG |
| 293               | TAG52:1-FA16:1 | TAG               | 368          | TAG53:4-FA20:4    | TAG          | 443 | TAG55:3-FA18:2 | TAG |
| 294               | TAG52:1-FA18:0 | TAG               | 369          | TAG53:5-FA20:4    | TAG          | 444 | TAG55:4-FA18:1 | TAG |
| 295               | TAG52:1-FA18:1 | TAG               | 370          | TAG54:0-FA18:0    | TAG          | 445 | TAG55:4-FA18:2 | TAG |
| 296               | TAG52:1-FA20:0 | TAG               | 371          | TAG54:1-FA16:0    | TAG          | 446 | TAG55:5-FA18:1 | TAG |
| 297               | TAG52:1-FA20:1 | TAG               | 372          | TAG54:1-FA18:0    | TAG          | 447 | TAG55:5-FA18:2 | TAG |
| 298               | TAG52:2-FA14:0 | TAG               | 373          | TAG54:1-FA18:1    | TAG          | 448 | TAG55:5-FA20:4 | TAG |
| 299               | TAG52:2-FA16:0 | TAG               | 374          | TAG54:1-FA20:0    | TAG          | 449 | TAG55:7-FA22:6 | TAG |
| 300               | TAG52:2-FA16:1 | TAG               | 375          | TAG54:1-FA20:1    | TAG          | 450 | TAG56:1-FA16:0 | TAG |

|     | <u>Metabolite</u> | <u>Class</u> |     | <u>Metabolite</u> | <u>Class</u> |
|-----|-------------------|--------------|-----|-------------------|--------------|
| 451 | TAG56:1-FA18:1    | TAG          | 526 | TAG58:6-FA18:0    | TAG          |
| 452 | TAG56:2-FA16:0    | TAG          | 527 | TAG58:6-FA18:1    | TAG          |
| 453 | TAG56:2-FA18:0    | TAG          | 528 | TAG58:6-FA20:4    | TAG          |
| 454 | TAG56:2-FA20:0    | TAG          | 529 | TAG58:6-FA22:4    | TAG          |
| 455 | TAG56:2-FA20:1    | TAG          | 530 | TAG58:6-FA22:5    | TAG          |
| 456 | TAG56:3-FA16:0    | TAG          | 531 | TAG58:7-FA18:1    | TAG          |
| 457 | TAG56:3-FA18:0    | TAG          | 532 | TAG58:7-FA18:2    | TAG          |
| 458 | TAG56:3-FA18:1    | TAG          | 533 | TAG58:7-FA20:4    | TAG          |
| 459 | TAG56:3-FA18:2    | TAG          | 534 | TAG58:7-FA22:6    | TAG          |
| 460 | TAG56:3-FA20:0    | TAG          | 535 | TAG58:8-FA18:1    | TAG          |
| 461 | TAG56:3-FA20:1    | TAG          | 536 | TAG58:8-FA18:2    | TAG          |
| 462 | TAG56:3-FA20:2    | TAG          | 537 | TAG58:8-FA20:3    | TAG          |
| 463 | TAG56:4-FA16:0    | TAG          | 538 | TAG58:8-FA20:4    | TAG          |
| 464 | TAG56:4-FA18:0    | TAG          | 539 | TAG58:8-FA22:5    | TAG          |
| 465 | TAG56:4-FA18:1    | TAG          | 540 | TAG58:8-FA22:6    | TAG          |
| 466 | TAG56:4-FA18:2    | TAG          | 541 | TAG58:9-FA18:1    | TAG          |
| 467 | TAG56:4-FA20:1    | TAG          | 542 | TAG58:9-FA18:2    | TAG          |
| 468 | TAG56:4-FA20:2    | TAG          | 543 | TAG58:9-FA20:4    | TAG          |
| 469 | TAG56:4-FA20:3    | TAG          | 544 | TAG58:9-FA22:5    | TAG          |
| 470 | TAG56:4-FA20:4    | TAG          | 545 | TAG58:9-FA22:6    | TAG          |
| 471 | TAG56:4-FA22:4    | TAG          | 546 | TAG60:11-FA22:6   | TAG          |
| 472 | TAG56:5-FA16:0    | TAG          |     |                   |              |
| 473 | TAG56:5-FA18:0    | TAG          |     |                   |              |
| 474 | TAG56:5-FA18:1    | TAG          |     |                   |              |
| 475 | TAG56:5-FA18:2    | TAG          |     |                   |              |
| 476 | TAG56:5-FA20:1    | TAG          |     |                   |              |
| 477 | TAG56:5-FA20:2    | TAG          |     |                   |              |
| 478 | TAG56:5-FA20:3    | TAG          |     |                   |              |
| 479 | TAG56:5-FA20:4    | TAG          |     |                   |              |
| 480 | TAG56:5-FA22:4    | TAG          |     |                   |              |
| 481 | TAG56:5-FA22:5    | TAG          |     |                   |              |
| 482 | TAG56:6-FA16:0    | TAG          |     |                   |              |
| 483 | TAG56:6-FA18:0    | TAG          |     |                   |              |
| 484 | TAG56:6-FA18:1    | TAG          |     |                   |              |
| 485 | TAG56:6-FA18:2    | TAG          |     |                   |              |
| 486 | TAG56:6-FA18:3    | TAG          |     |                   |              |
| 487 | TAG56:6-FA20:2    | TAG          |     |                   |              |
| 488 | TAG56:6-FA20:3    | TAG          |     |                   |              |
| 489 | TAG56:6-FA20:4    | TAG          |     |                   |              |
| 490 | TAG56:6-FA20:5    | TAG          |     |                   |              |
| 491 | TAG56:6-FA22:4    | TAG          |     |                   |              |
| 492 | TAG56:6-FA22:5    | TAG          |     |                   |              |
| 493 | TAG56:6-FA22:6    | TAG          |     |                   |              |
| 494 | TAG56:7-FA16:0    | TAG          |     |                   |              |
| 495 | TAG56:7-FA16:1    | TAG          |     |                   |              |
| 496 | TAG56:7-FA18:1    | TAG          |     |                   |              |
| 497 | TAG56:7-FA18:2    | TAG          |     |                   |              |
| 498 | TAG56:7-FA18:3    | TAG          |     |                   |              |
| 499 | TAG56:7-FA20:3    | TAG          |     |                   |              |
| 500 | TAG56:7-FA20:4    | TAG          |     |                   |              |
| 501 | TAG56:7-FA20:5    | TAG          |     |                   |              |
| 502 | TAG56:7-FA22:6    | TAG          |     |                   |              |
| 503 | TAG56:8-FA16:0    | TAG          |     |                   |              |
| 504 | TAG56:8-FA16:1    | TAG          |     |                   |              |
| 505 | TAG56:8-FA18:1    | TAG          |     |                   |              |
| 506 | TAG56:8-FA18:2    | TAG          |     |                   |              |
| 507 | TAG56:8-FA18:3    | TAG          |     |                   |              |
| 508 | TAG56:8-FA20:4    | TAG          |     |                   |              |
| 509 | TAG56:8-FA20:5    | TAG          |     |                   |              |
| 510 | TAG56:8-FA22:5    | TAG          |     |                   |              |
| 511 | TAG56:8-FA22:6    | TAG          |     |                   |              |
| 512 | TAG56:9-FA18:3    | TAG          |     |                   |              |
| 513 | TAG56:9-FA20:4    | TAG          |     |                   |              |
| 514 | TAG56:9-FA20:5    | TAG          |     |                   |              |
| 515 | TAG56:9-FA22:6    | TAG          |     |                   |              |
| 516 | TAG57:2-FA18:1    | TAG          |     |                   |              |
| 517 | TAG57:3-FA18:2    | TAG          |     |                   |              |
| 518 | TAG58:10-FA18:2   | TAG          |     |                   |              |
| 519 | TAG58:10-FA20:4   | TAG          |     |                   |              |
| 520 | TAG58:10-FA22:5   | TAG          |     |                   |              |
| 521 | TAG58:10-FA22:6   | TAG          |     |                   |              |
| 522 | TAG58:2-FA18:1    | TAG          |     |                   |              |
| 523 | TAG58:3-FA18:1    | TAG          |     |                   |              |
| 524 | TAG58:5-FA18:1    | TAG          |     |                   |              |
| 525 | TAG58:6-FA16:0    | TAG          |     |                   |              |

**Table S3. Plasma concentrations ( $\mu\text{M}$ ) for representative lipid species by class.** Within each lipid class, the mean, minimum, and maximum concentrations in control participants (A: Fred Hutch, B: Roswell Park) for two individual lipid metabolites are presented—the species with the lowest, or the highest, mean concentration.

**A. Fred Hutch (FH)**

| <u>Class</u> | <u>Metabolite</u> | <u>Mean</u> | <u>Min</u> | <u>Max</u> |
|--------------|-------------------|-------------|------------|------------|
| CE           | CE(22:2)          | 0.31        | 0.16       | 0.65       |
| CE           | CE(18:2)          | 1761.50     | 991.47     | 2560.56    |
| CER          | CER(18:0)         | 0.18        | 0.07       | 0.39       |
| CER          | CER(24:0)         | 3.23        | 1.76       | 6.88       |
| DAG          | DAG(18:1/22:6)    | 0.27        | 0.06       | 1.11       |
| DAG          | DAG(18:1/18:2)    | 7.77        | 3.20       | 17.88      |
| FFA          | FFA(20:5)         | 1.13        | 0.48       | 3.33       |
| FFA          | FFA(17:0)         | 8.50        | 4.52       | 68.15      |
| LPC          | LPC(22:5)         | 0.50        | 0.23       | 1.04       |
| LPC          | LPC(16:0)         | 122.89      | 70.46      | 194.16     |
| LPE          | LPE(16:0)         | 0.91        | 0.57       | 1.73       |
| LPE          | LPE(18:0)         | 1.70        | 0.97       | 3.08       |
| PC           | PC(15:0/18:1)     | 1.08        | 0.54       | 1.99       |
| PC           | PC(16:0/18:2)     | 573.08      | 393.32     | 827.95     |
| PE           | PE(18:2/16:1)     | 0.49        | 0.17       | 1.56       |
| PE           | PE(16:0/22:6)     | 10.95       | 3.38       | 24.81      |
| SM           | SM(26:0)          | 0.65        | 0.46       | 0.98       |
| SM           | SM(22:0)          | 162.68      | 93.12      | 272.33     |
| TAG          | TAG52:2-FA20:0    | 0.17        | 0.07       | 0.32       |
| TAG          | TAG52:2-FA18:1    | 439.97      | 118.76     | 949.63     |

**B. Roswell Park (RP)**

| <u>Class</u> | <u>Metabolite</u> | <u>Mean</u> | <u>Min</u> | <u>Max</u> |
|--------------|-------------------|-------------|------------|------------|
| CE           | CE(22:2)          | 0.25        | 0.16       | 0.58       |
| CE           | CE(18:2)          | 1936.11     | 1052.26    | 2922.62    |
| CER          | CER(18:0)         | 0.17        | 0.07       | 0.34       |
| CER          | CER(24:0)         | 3.70        | 1.27       | 7.07       |
| DAG          | DAG(18:1/22:6)    | 0.23        | 0.08       | 0.81       |
| DAG          | DAG(18:1/18:2)    | 8.75        | 2.09       | 31.22      |
| FFA          | FFA(24:0)         | 0.73        | 0.48       | 1.17       |
| FFA          | FFA(17:0)         | 5.74        | 3.29       | 9.64       |
| LPC          | LPC(22:5)         | 0.56        | 0.20       | 1.04       |
| LPC          | LPC(16:0)         | 138.00      | 80.54      | 206.27     |
| LPE          | LPE(16:0)         | 0.96        | 0.42       | 1.58       |
| LPE          | LPE(18:0)         | 1.72        | 0.71       | 2.80       |
| PC           | PC(15:0/18:1)     | 1.03        | 0.55       | 2.54       |
| PC           | PC(16:0/18:2)     | 628.72      | 338.78     | 939.06     |
| PE           | PE(18:2/16:1)     | 0.57        | 0.27       | 1.08       |
| PE           | PE(P-18:1/20:4)   | 9.63        | 2.51       | 24.21      |
| SM           | SM(26:0)          | 0.59        | 0.38       | 0.83       |
| SM           | SM(22:0)          | 216.67      | 97.73      | 313.71     |
| TAG          | TAG52:2-FA20:0    | 0.24        | 0.08       | 0.66       |
| TAG          | TAG52:2-FA18:1    | 538.12      | 182.55     | 2356.39    |

**Table S4. Selected top differential metabolites by case status.** 249 lipid species satisfying FDR  $q < 0.05$  in both cohorts (Figure 1B, bottom) were sorted and rank ordered by P value (FH). Beta coefficients, P values, and FDR q values derived from linear regression analyses are shown, by cohort, for the top ten metabolites.

|    | Class | Metabolite     | FH |       |          |          | RP  |       |          |          |
|----|-------|----------------|----|-------|----------|----------|-----|-------|----------|----------|
|    |       |                | N  | Beta  | P        | q        | N   | Beta  | P        | q        |
| 1  | TAG   | TAG44:1-FA18:1 | 90 | -1.16 | 5.54E-06 | 9.16E-04 | 116 | -1.06 | 1.89E-03 | 3.29E-03 |
| 2  | PC    | PC(14:0/18:2)  | 94 | -0.71 | 6.43E-06 | 9.16E-04 | 118 | -0.64 | 1.28E-05 | 1.02E-04 |
| 3  | TAG   | TAG50:5-FA18:3 | 94 | -0.88 | 7.33E-06 | 9.16E-04 | 118 | -1.00 | 2.31E-06 | 4.06E-05 |
| 4  | PC    | PC(16:0/18:3)  | 94 | -0.50 | 9.79E-06 | 9.16E-04 | 118 | -0.60 | 3.13E-07 | 2.22E-05 |
| 5  | CE    | CE(18:4)       | 94 | -0.79 | 1.23E-05 | 9.16E-04 | 118 | -0.81 | 1.79E-05 | 1.27E-04 |
| 6  | PC    | PC(14:0/20:4)  | 92 | -0.65 | 1.29E-05 | 9.16E-04 | 112 | -0.43 | 2.53E-04 | 6.69E-04 |
| 7  | TAG   | TAG48:4-FA18:3 | 88 | -1.04 | 1.38E-05 | 9.16E-04 | 117 | -1.34 | 5.03E-07 | 2.22E-05 |
| 8  | TAG   | TAG50:4-FA18:3 | 94 | -0.88 | 1.40E-05 | 9.16E-04 | 118 | -0.95 | 1.36E-06 | 3.22E-05 |
| 9  | PC    | PC(18:2/20:3)  | 91 | -0.66 | 1.64E-05 | 9.16E-04 | 117 | -0.66 | 8.88E-06 | 8.08E-05 |
| 10 | TAG   | TAG46:2-FA14:0 | 92 | -1.26 | 1.73E-05 | 9.16E-04 | 118 | -1.36 | 9.82E-06 | 8.42E-05 |

**Table S5. Selected top differential metabolites by case status in stage-stratified analyses.** Lipid species with concentration differences in (A) early-stage (I-II) cases or (B) late-stage (III-IV) cases, relative to controls, were sorted and rank ordered by P value. Beta coefficients, P values, and FDR q values derived from linear regression analyses are shown for the top ten metabolites in each analysis.

**A.**

|           | <b>Class</b> | <b>Metabolite</b> | <b>N</b> | <b>Beta</b> | <b>P</b> | <b>q</b> |
|-----------|--------------|-------------------|----------|-------------|----------|----------|
| <b>1</b>  | TAG          | TAG56:2-FA16:0    | 83       | -0.97       | 1.3E-05  | 6.2E-03  |
| <b>2</b>  | PC           | PC(16:0/18:3)     | 84       | -0.62       | 6.1E-05  | 6.2E-03  |
| <b>3</b>  | TAG          | TAG52:4-FA18:0    | 84       | -0.89       | 6.6E-05  | 6.2E-03  |
| <b>4</b>  | TAG          | TAG54:2-FA20:0    | 84       | -0.74       | 7.1E-05  | 6.2E-03  |
| <b>5</b>  | TAG          | TAG50:3-FA18:0    | 83       | -1.07       | 7.4E-05  | 6.2E-03  |
| <b>6</b>  | TAG          | TAG52:2-FA14:0    | 78       | -0.92       | 8.9E-05  | 6.2E-03  |
| <b>7</b>  | TAG          | TAG52:8-FA16:1    | 76       | -0.97       | 9.9E-05  | 6.2E-03  |
| <b>8</b>  | TAG          | TAG54:1-FA16:0    | 84       | -0.93       | 1.1E-04  | 6.2E-03  |
| <b>9</b>  | DAG          | DAG(14:0/18:1)    | 76       | -0.83       | 1.2E-04  | 6.2E-03  |
| <b>10</b> | TAG          | TAG50:3-FA18:3    | 84       | -0.95       | 1.3E-04  | 6.2E-03  |

**B.**

|           | <b>Class</b> | <b>Metabolite</b> | <b>N</b> | <b>Beta</b> | <b>P</b> | <b>FDR</b> |
|-----------|--------------|-------------------|----------|-------------|----------|------------|
| <b>1</b>  | CE           | CE(14:0)          | 92       | -0.81       | 9.7E-07  | 3.1E-04    |
| <b>2</b>  | TAG          | TAG50:5-FA16:1    | 92       | -1.23       | 1.5E-06  | 3.1E-04    |
| <b>3</b>  | CE           | CE(14:1)          | 92       | -0.95       | 1.7E-06  | 3.1E-04    |
| <b>4</b>  | LPC          | LPC(16:0)         | 92       | -0.37       | 3.1E-06  | 3.1E-04    |
| <b>5</b>  | TAG          | TAG48:4-FA18:3    | 91       | -1.50       | 3.3E-06  | 3.1E-04    |
| <b>6</b>  | LPC          | LPC(18:0)         | 92       | -0.45       | 4.3E-06  | 3.1E-04    |
| <b>7</b>  | TAG          | TAG52:2-FA14:0    | 86       | -1.05       | 4.3E-06  | 3.1E-04    |
| <b>8</b>  | TAG          | TAG48:4-FA14:1    | 90       | -1.16       | 4.5E-06  | 3.1E-04    |
| <b>9</b>  | TAG          | TAG48:3-FA18:3    | 92       | -1.52       | 6.5E-06  | 3.1E-04    |
| <b>10</b> | TAG          | TAG52:5-FA20:3    | 92       | -1.06       | 7.2E-06  | 3.1E-04    |



**Table S6. Performance characteristics for selected lipid species (Table 4) using data from FH cohort.** Single lipid species were combined with CA125, age, and BMI, to classify early-stage (I-II) cases versus controls (FH cohort). Logistic regression was used to model the log odds of case status as a linear function of  $\log_2$  CA125, age, and BMI, with or without a given lipid metabolite (M), after imputing missing values for each species to  $\frac{1}{2}$  the minimum concentration detected for that species across all participants. ROC curve analysis was conducted to estimate AUC and *spec90* conferred by the joint model (with M) versus the base model (without M: AUC=0.802, *spec90*=0.532). Species with  $\Delta\text{spec90}>0.05$  are listed in red.

|           | <b>Class</b> | <b>Metabolite</b> | <b><i>spec90</i></b> | <b><math>\Delta\text{spec90}</math></b> | <b><math>P_{\Delta s}</math></b> | <b>AUC</b> | <b><math>\Delta\text{AUC}</math></b> | <b><math>P_{\Delta A}</math></b> |
|-----------|--------------|-------------------|----------------------|-----------------------------------------|----------------------------------|------------|--------------------------------------|----------------------------------|
| <b>1</b>  | DAG          | DAG(16:1/18:1)    | 0.68                 | 0.15                                    | 0.25                             | 0.88       | 0.08                                 | 0.10                             |
| <b>2</b>  | CE           | CE(18:1)          | 0.51                 | -0.02                                   | 0.70                             | 0.82       | 0.02                                 | 0.54                             |
| <b>3</b>  | CE           | CE(17:0)          | 0.55                 | 0.02                                    | 0.38                             | 0.80       | 0.00                                 | 0.79                             |
| <b>4</b>  | DAG          | DAG(20:0/20:0)    | 0.53                 | 0.00                                    |                                  | 0.80       | 0.00                                 |                                  |
| <b>5</b>  | TAG          | TAG52:2-FA20:2    | 0.40                 | -0.13                                   | 0.25                             | 0.83       | 0.02                                 | 0.57                             |
| <b>6</b>  | TAG          | TAG54:3-FA20:3    | 0.43                 | -0.11                                   | 0.31                             | 0.84       | 0.03                                 | 0.46                             |
| <b>7</b>  | PE           | PE(P-16:0/20:3)   | 0.57                 | 0.04                                    | 0.43                             | 0.81       | 0.01                                 | 0.82                             |
| <b>8</b>  | DAG          | DAG(18:0/18:2)    | 0.72                 | 0.19                                    | 0.24                             | 0.92       | 0.12                                 | 0.08                             |
| <b>9</b>  | TAG          | TAG56:4-FA18:0    | 0.74                 | 0.21                                    | 0.02                             | 0.91       | 0.11                                 | 0.02                             |
| <b>10</b> | CE           | CE(20:0)          | 0.53                 | 0.00                                    | 1.00                             | 0.79       | -0.01                                | 0.68                             |

**Table S7. Patient and tumor characteristics (GEO samples).**

|                  | <b>GSE4122 (n=50)</b> |        | <b>GSE57477 (n=54)</b> |            | <b>GSE7463 (n=19)</b> |            | <b>GSE6822 (n=34)</b> |        | <b>Pooled (n=157)</b> |        |
|------------------|-----------------------|--------|------------------------|------------|-----------------------|------------|-----------------------|--------|-----------------------|--------|
|                  | Malignant             | Benign | Malignant              | Benign     | Malignant             | Benign     | Malignant             | Benign | Malignant             | Benign |
| Age [mean (sd)]  | NA                    |        | 67.1 (11.3)            | 62.5 (6.4) | 58.4 (11.5)           | 63.4 (9.0) | NA                    |        | 106                   | 51     |
| <b>Histology</b> |                       |        |                        |            |                       |            |                       |        |                       |        |
| Serous           | 16                    | 7      | 37                     | 17         | 7                     | 4          | 28                    | 6      | 88                    | 34     |
| Non-serous       | 15                    | 6      | 0                      | 0          | 2                     | 0          | 0                     | 0      | 17                    | 6      |
| N/A              | 1                     | 5      | 0                      | 0          | 0                     | 6          | 0                     | 0      | 1                     | 11     |
| <b>Stage</b>     |                       |        |                        |            |                       |            |                       |        |                       |        |
| I                | 1                     |        | 2                      |            | 1                     |            | 2                     |        | 6                     |        |
| II               | 6                     |        | 4                      |            | 1                     |            | 2                     |        | 13                    |        |
| III              | 14                    |        | 26                     |            | 6                     |            | 20                    |        | 66                    |        |
| IV               | 0                     |        | 5                      |            | 1                     |            | 0                     |        | 6                     |        |
| NA               | 11                    |        | 0                      |            | 0                     |            | 4                     |        | 15                    |        |

**[GSE4122]**

GSM94332, GSM94339, GSM94341, GSM94344, GSM94346, GSM94347, GSM94349, GSM94352, GSM94359, GSM94368, GSM94372, GSM94375, GSM94377, GSM94386, GSM94393, GSM94396, GSM94402, GSM94404, GSM94405, GSM94408, GSM94409, GSM94411, GSM94412, GSM94413, GSM94414, GSM94415, GSM94417, GSM94420, GSM94421, GSM94423, GSM94425, GSM94426, GSM94348, GSM94363, GSM94366, GSM94373, GSM94379, GSM94381, GSM94382, GSM94383, GSM94388, GSM94390, GSM94392, GSM94395, GSM94398, GSM94400, GSM94401, GSM94416, GSM94422, GSM94424

**[GSE57477]**

GSM1383532, GSM1383530, GSM1383529, GSM1383526, GSM1383525, GSM1383523, GSM1383522, GSM1383519, GSM1383514, GSM1383511, GSM1383507, GSM1383504, GSM1383503, GSM1383502, GSM1383501, GSM1383499, GSM1383498, GSM1383495, GSM1383494, GSM1383492, GSM1383491, GSM1383490, GSM1383488, GSM1383487, GSM1383485, GSM1383484, GSM1383482, GSM1383480, GSM1383479, GSM1383478, GSM1383476, GSM1383474, GSM1383473, GSM1383471, GSM1383469, GSM1383468, GSM1383467, GSM1383527, GSM1383524, GSM1383520, GSM1383518, GSM1383515, GSM1383513, GSM1383510, GSM1383509, GSM1383508, GSM1383506, GSM1383505, GSM1383496, GSM1383489, GSM1383481, GSM1383475, GSM1383472, GSM1383470

**[GSE7463]**

GSM180636, GSM180637, GSM180638, GSM180639, GSM180640, GSM180641, GSM180642, GSM180643, GSM180644, GSM180626, GSM180627, GSM180628, GSM180629, GSM180630, GSM180631, GSM180632, GSM180633, GSM180634, GSM180635

**[GSE6822]**

GSM157233, GSM157244, GSM157267, GSM157268, GSM157292, GSM157297, GSM157277, GSM157278, GSM157229, GSM157230, GSM157232, GSM157241, GSM157262, GSM157263, GSM157265, GSM157266, GSM157271, GSM157272, GSM157274, GSM157275, GSM157281, GSM157282, GSM157285, GSM157287, GSM157288, GSM157291, GSM157293, GSM157294, GSM157225, GSM157255, GSM157256, GSM157257, GSM157258, GSM157284

**Table S8. Lipid transport-related GO gene sets selected and individual genes available for analysis.** 180 GO gene sets with “lipid” or “lipoprotein” included in the set name were identified. 61 of the 180 were retained based on relationships to lipid transport. 145 of 402 unique genes captured by these 61 GO gene sets had expression profiling data available for analysis in all four GEO datasets and for subsequent meta-analysis.

- 1 GO\_APOLIPOPROTEIN\_A\_I\_BINDING
- 2 GO\_APOLIPOPROTEIN\_A\_I\_MEDIATED\_SIGNALING\_PATHWAY
- 3 GO\_APOLIPOPROTEIN\_BINDING
- 4 GO\_APOLIPOPROTEIN\_RECEPTOR\_BINDING
- 5 GO\_ATPASE\_COUPLED\_INTRAMEMBRANE\_LIPID\_TRANSPORTER\_ACTIVITY
- 6 GO\_ATPASE\_COUPLED\_LIPID\_TRANSMEMBRANE\_TRANSPORTER\_ACTIVITY
- 7 GO\_BIOACTIVE\_LIPID\_RECEPTOR\_ACTIVITY
- 8 GO\_HIGH\_DENSITY\_LIPOPROTEIN\_PARTICLE
- 9 GO\_HIGH\_DENSITY\_LIPOPROTEIN\_PARTICLE\_ASSEMBLY
- 10 GO\_HIGH\_DENSITY\_LIPOPROTEIN\_PARTICLE\_BINDING
- 11 GO\_HIGH\_DENSITY\_LIPOPROTEIN\_PARTICLE\_CLEARANCE
- 12 GO\_HIGH\_DENSITY\_LIPOPROTEIN\_PARTICLE\_REMODELING
- 13 GO\_INTERMEDIATE\_DENSITY\_LIPOPROTEIN\_PARTICLE
- 14 GO\_INTERMEMBRANE\_LIPID\_TRANSFER
- 15 GO\_INTRACELLULAR\_LIPID\_TRANSPORT
- 16 GO\_INTRAMEMBRANE\_LIPID\_TRANSPORTER\_ACTIVITY
- 17 GO\_LIPID\_EXPORT\_FROM\_CELL
- 18 GO\_LIPID\_IMPORT\_INTO\_CELL
- 19 GO\_LIPID\_TRANSFER\_ACTIVITY
- 20 GO\_LIPID\_TRANSLOCATION
- 21 GO\_LIPID\_TRANSPORTER\_ACTIVITY
- 22 GO\_LIPOPROTEIN\_PARTICLE\_RECEPTOR\_ACTIVITY
- 23 GO\_LIPOPROTEIN\_PARTICLE\_RECEPTOR\_BINDING
- 24 GO\_LOW\_DENSITY\_LIPOPROTEIN\_PARTICLE
- 25 GO\_LOW\_DENSITY\_LIPOPROTEIN\_PARTICLE\_BINDING
- 26 GO\_LOW\_DENSITY\_LIPOPROTEIN\_PARTICLE\_CLEARANCE
- 27 GO\_LOW\_DENSITY\_LIPOPROTEIN\_PARTICLE\_RECEPTOR\_ACTIVITY
- 28 GO\_LOW\_DENSITY\_LIPOPROTEIN\_PARTICLE\_RECEPTOR\_BINDING
- 29 GO\_LOW\_DENSITY\_LIPOPROTEIN\_PARTICLE\_RECEPTOR\_BIOSYNTHETIC\_PROCESS
- 30 GO\_LOW\_DENSITY\_LIPOPROTEIN\_PARTICLE\_RECEPTOR\_CATABOLIC\_PROCESS
- 31 GO\_LOW\_DENSITY\_LIPOPROTEIN\_PARTICLE\_REMODELING
- 32 GO\_LOW\_DENSITY\_LIPOPROTEIN\_RECEPTOR\_PARTICLE\_METABOLIC\_PROCESS
- 33 GO\_NEGATIVE\_REGULATION\_OF\_LIPID\_TRANSPORT
- 34 GO\_NEGATIVE\_REGULATION\_OF\_LIPOPROTEIN\_PARTICLE\_CLEARANCE
- 35 GO\_NEGATIVE\_REGULATION\_OF\_LOW\_DENSITY\_LIPOPROTEIN\_PARTICLE\_CLEARANCE
- 36 GO\_PHOSPHOLIPID\_TRANSFER\_ACTIVITY
- 37 GO\_PHOSPHOLIPID\_TRANSPORT
- 38 GO\_PHOSPHOLIPID\_TRANSPORTER\_ACTIVITY
- 39 GO\_PLASMA\_LIPOPROTEIN\_PARTICLE\_CLEARANCE
- 40 GO\_POSITIVE\_REGULATION\_OF\_LIPID\_TRANSPORT
- 41 GO\_POSITIVE\_REGULATION\_OF\_LIPOPROTEIN\_PARTICLE\_CLEARANCE
- 42 GO\_POSITIVE\_REGULATION\_OF\_PHOSPHOLIPID\_TRANSPORT
- 43 GO\_REGULATION\_OF\_HIGH\_DENSITY\_LIPOPROTEIN\_PARTICLE\_CLEARANCE
- 44 GO\_REGULATION\_OF\_LIPID\_TRANSPORT
- 45 GO\_REGULATION\_OF\_LIPID\_TRANSPORTER\_ACTIVITY
- 46 GO\_REGULATION\_OF\_LIPOPROTEIN\_PARTICLE\_CLEARANCE
- 47 GO\_REGULATION\_OF\_LOW\_DENSITY\_LIPOPROTEIN\_PARTICLE\_CLEARANCE
- 48 GO\_REGULATION\_OF\_LOW\_DENSITY\_LIPOPROTEIN\_PARTICLE\_RECEPTOR\_BINDING
- 49 GO\_REGULATION\_OF\_LOW\_DENSITY\_LIPOPROTEIN\_PARTICLE\_RECEPTOR\_CATABOLIC\_PROCESS
- 50 GO\_REGULATION\_OF\_PLASMA\_LIPOPROTEIN\_PARTICLE\_LEVELS
- 51 GO\_REGULATION\_OF\_VERY\_LOW\_DENSITY\_LIPOPROTEIN\_PARTICLE\_CLEARANCE
- 52 GO\_REGULATION\_OF\_VERY\_LOW\_DENSITY\_LIPOPROTEIN\_PARTICLE\_REMODELING
- 53 GO\_SPHERICAL\_HIGH\_DENSITY\_LIPOPROTEIN\_PARTICLE
- 54 GO\_SPHINGOLIPID\_TRANSFER\_ACTIVITY
- 55 GO\_SPHINGOLIPID\_TRANSPORTER\_ACTIVITY
- 56 GO\_TRIGLYCERIDE\_RICH\_LIPOPROTEIN\_PARTICLE\_CLEARANCE
- 57 GO\_TRIGLYCERIDE\_RICH\_LIPOPROTEIN\_PARTICLE\_REMODELING
- 58 GO\_TRIGLYCERIDE\_RICH\_PLASMA\_LIPOPROTEIN\_PARTICLE
- 59 GO\_VERY\_LOW\_DENSITY\_LIPOPROTEIN\_PARTICLE\_ASSEMBLY
- 60 GO\_VERY\_LOW\_DENSITY\_LIPOPROTEIN\_PARTICLE\_CLEARANCE
- 61 GO\_VERY\_LOW\_DENSITY\_LIPOPROTEIN\_PARTICLE\_REMODELING



**Figure S1. Lipid class assignments for 546 analyzed lipid species.** ~75% are triacylglycerols (TAG). The remaining 138 species are classified as diacylglycerols (DAG), free fatty acids (FFA), cholesterol esters (CE), phosphatidylcholines (PC), phosphatidylethanolamines (PE), lysophosphatidylcholines (LPC), lysophosphatidylethanolamines (LPE), sphingomyelins (SM), and ceramides (CER).

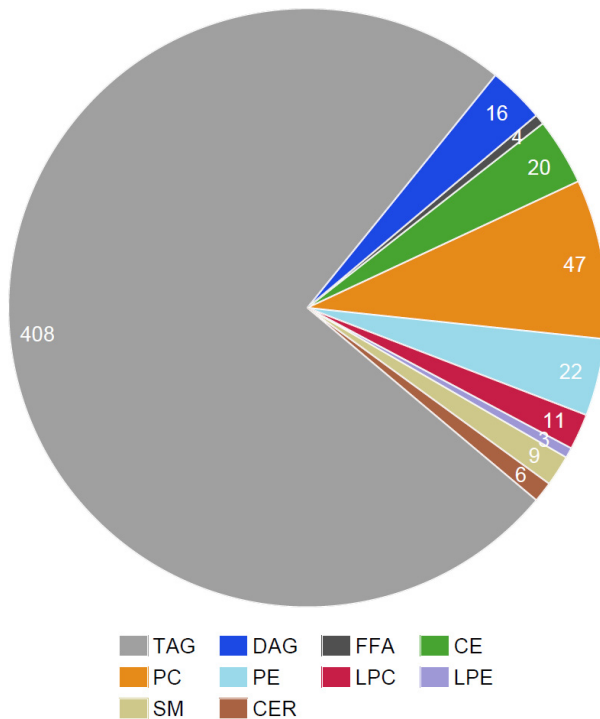

**Figure S2. Distributions of coefficients of variation (CV) for 546 analyzed lipid species.** Mean, minimum (Min), and maximum (Max) CV listed for each lipid class (A: Fred Hutch, B: Roswell Park).

**A.**

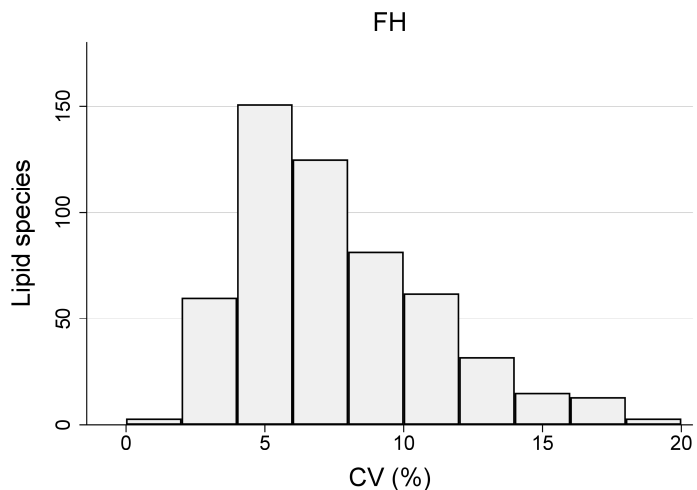

| <u>Class</u> | <u>N</u> | <u>Mean</u> | <u>Min</u> | <u>Max</u> |
|--------------|----------|-------------|------------|------------|
| CE           | 20       | <b>4.0</b>  | 1.4        | 9.3        |
| CER          | 6        | <b>7.6</b>  | 4.4        | 15.4       |
| DAG          | 16       | <b>10.6</b> | 7.7        | 15.3       |
| FFA          | 4        | <b>7.6</b>  | 3.1        | 12.0       |
| LPC          | 11       | <b>11.3</b> | 3.8        | 17.8       |
| LPE          | 3        | <b>10.7</b> | 6.9        | 17.5       |
| PC           | 47       | <b>10.7</b> | 3.7        | 19.2       |
| PE           | 22       | <b>13.0</b> | 7.6        | 17.4       |
| SM           | 9        | <b>7.9</b>  | 3.2        | 11.3       |
| TAG          | 408      | <b>6.8</b>  | 1.9        | 19.9       |

**B.**

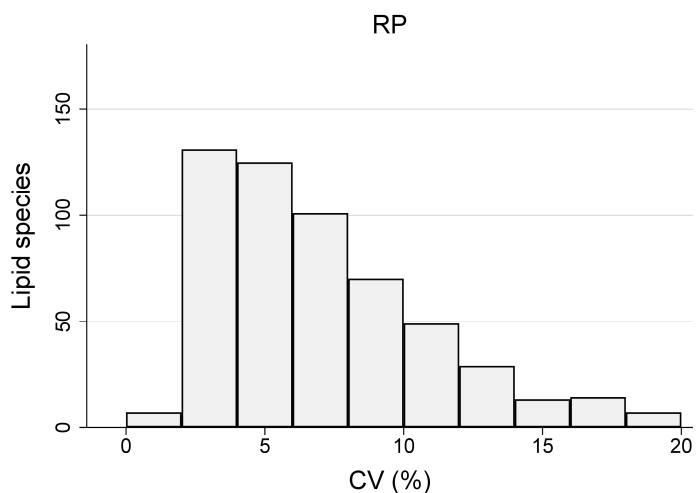

| <u>Class</u> | <u>N</u> | <u>Mean</u> | <u>Min</u> | <u>Max</u> |
|--------------|----------|-------------|------------|------------|
| CE           | 20       | <b>3.8</b>  | 1.1        | 9.4        |
| CER          | 6        | <b>6.3</b>  | 3.8        | 11.1       |
| DAG          | 16       | <b>11.4</b> | 7.7        | 16.0       |
| FFA          | 4        | <b>7.6</b>  | 4.5        | 9.5        |
| LPC          | 11       | <b>10.1</b> | 3.7        | 16.7       |
| LPE          | 3        | <b>8.0</b>  | 3.7        | 13.1       |
| PC           | 47       | <b>8.8</b>  | 3.0        | 16.7       |
| PE           | 22       | <b>14.2</b> | 7.9        | 19.7       |
| SM           | 9        | <b>5.4</b>  | 1.8        | 8.3        |
| TAG          | 408      | <b>6.4</b>  | 1.8        | 20.0       |

**Figure S3. Lipid class differences in cases versus controls.** Within each cohort, missing values for each species were imputed to  $\frac{1}{2}$  the minimum concentration detected for that species across all participants. Concentrations for all species in a given class were summed and  $\log_2$ -transformed to generate class-level variables, and regressed on case status with adjustment for age and BMI. (A) All cases vs. controls, by cohort (FH: solid, RP: outlined). (B) Early-stage (I-II: “ $\Delta$ ”) or late-stage (III-IV: “ $\times$ ”) cases vs. controls (RP only). \*Lipid classes with  $P < 0.005$  ( $=0.05/10$ ) in both cohorts (A), or both subgroups (B). FFA, CER:  $P > 0.05$  (gray).

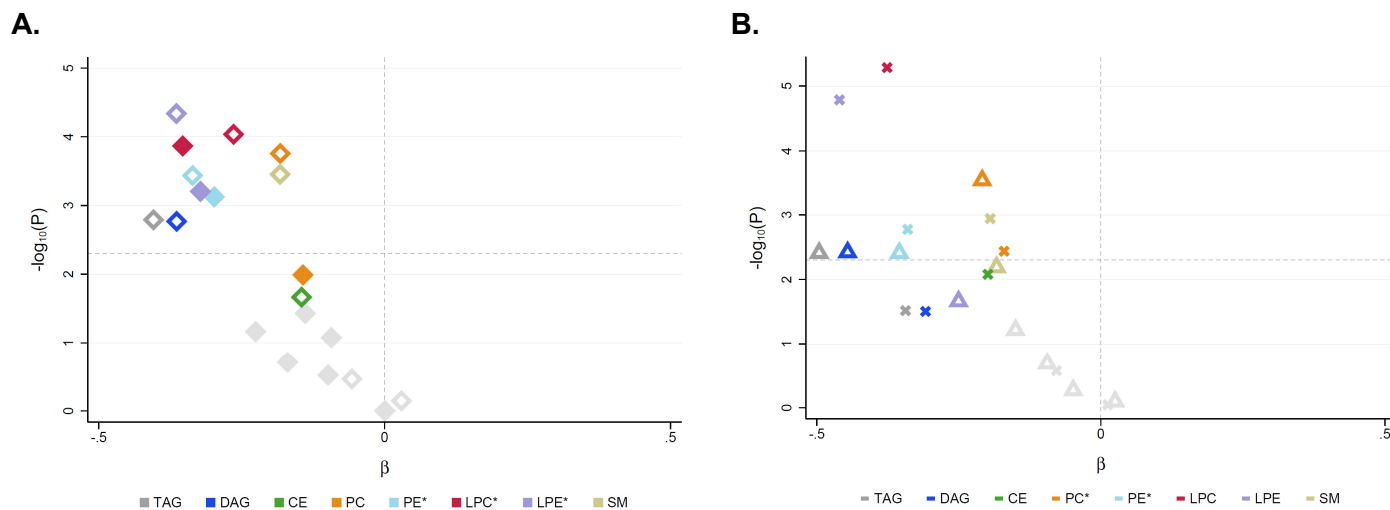

**Figure S4. Plasma CA125 values (U/mL) for cases and controls.** Distributions for both early-stage (blue) and late-stage (red) cases, as indicated.

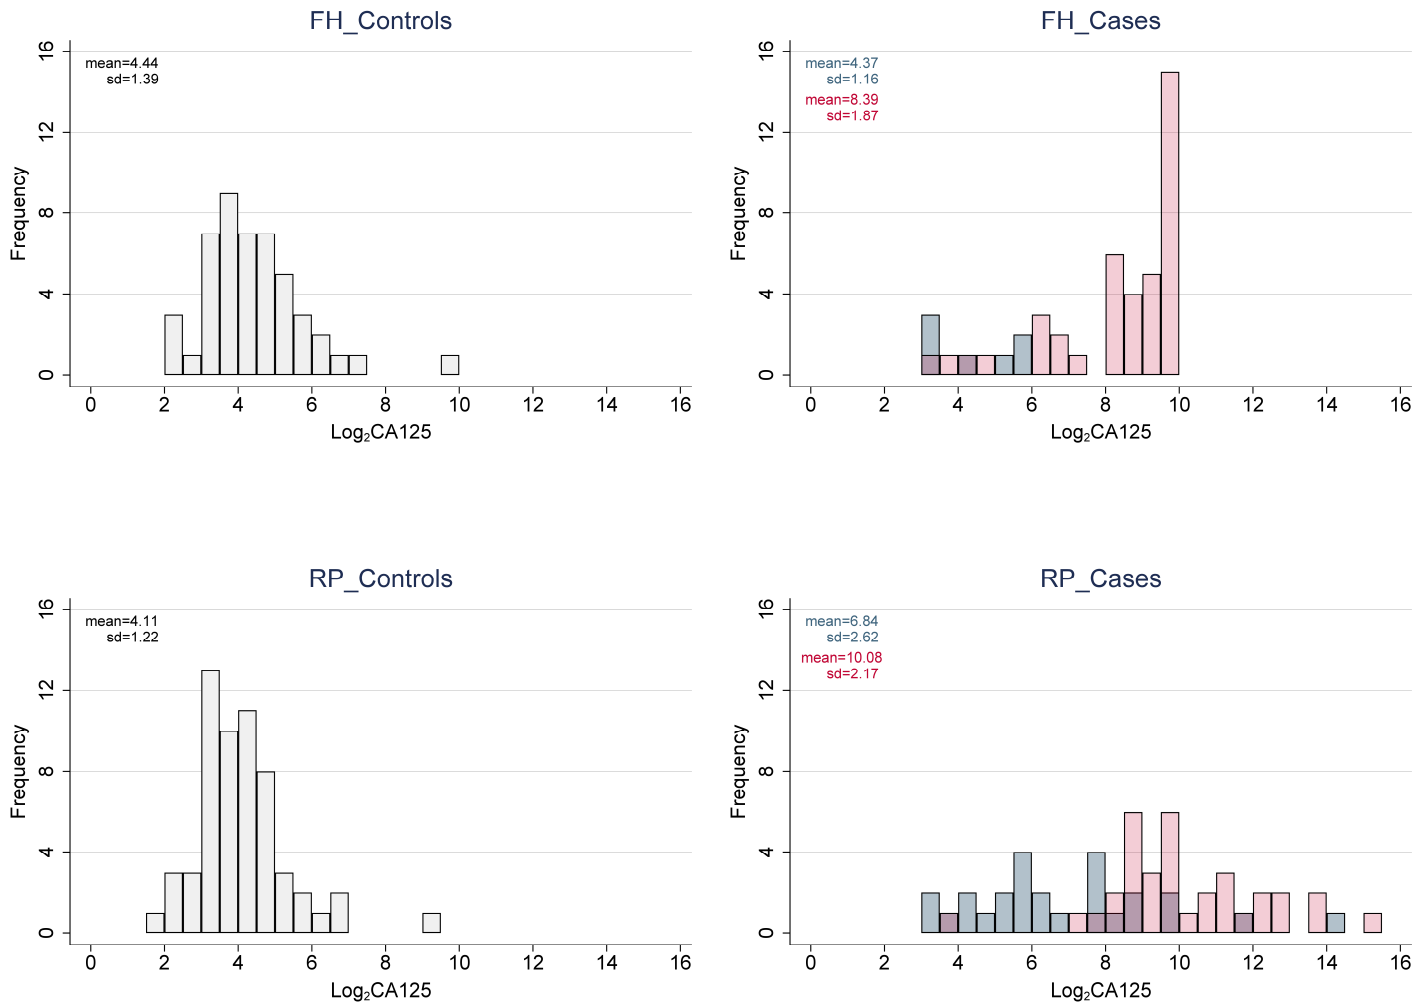

\*NOTE: N=14 CA125 values >1000 U/mL (FH) could not be further resolved due to limited remaining plasma and were recorded as  $\geq 1000$  U/mL.



**Figure S5. ROC curves and performance metrics for base models comprised of CA125, age, and BMI.** Models were built using data from all cases and controls in the Fred Hutch (A) or Roswell Park (B) patient cohorts. Performance was assessed across all patients in a given cohort (left), or in subgroups (right) comprised of controls and early-stage cases (blue), or controls and late-stage cases (red).

**A. Fred Hutch (FH)**

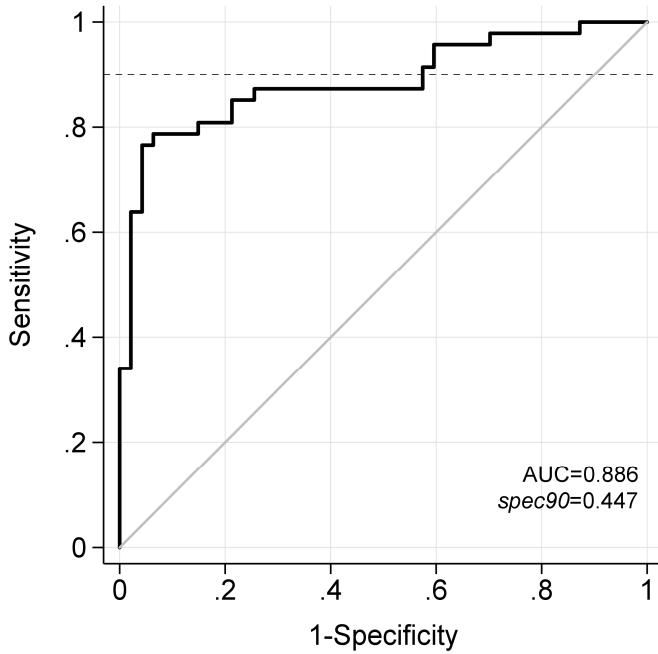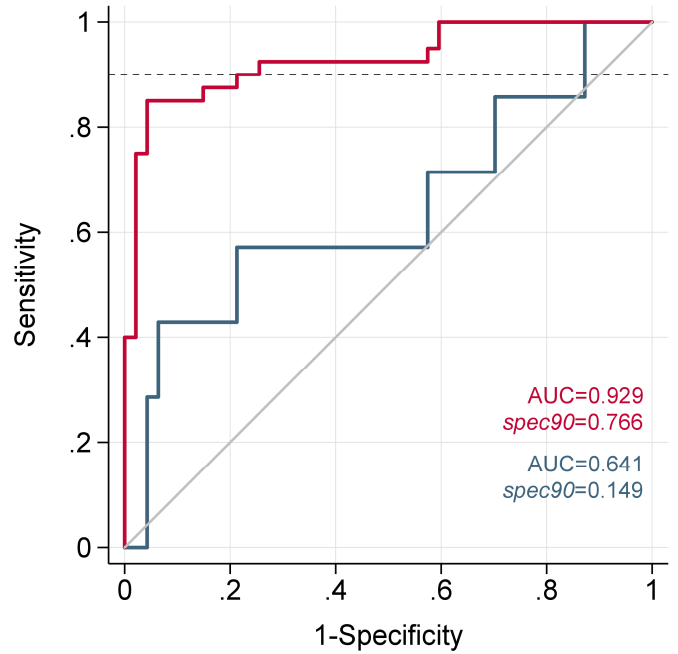

**B. Roswell Park (RP)**

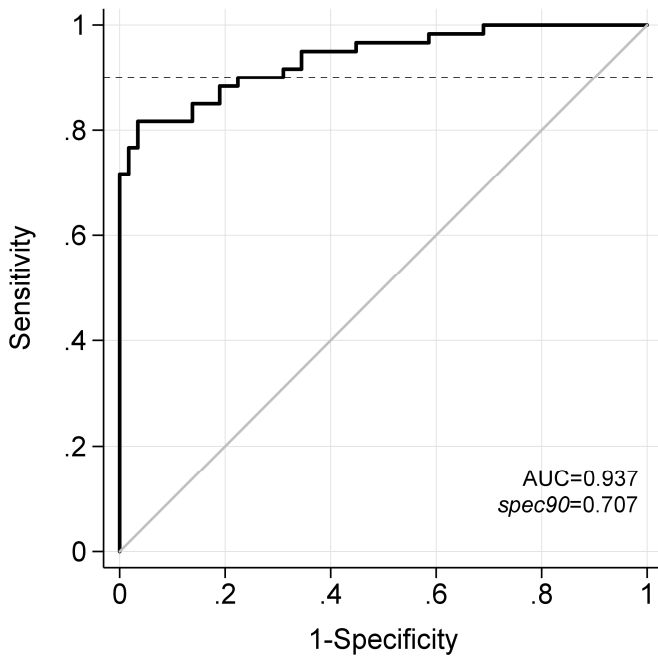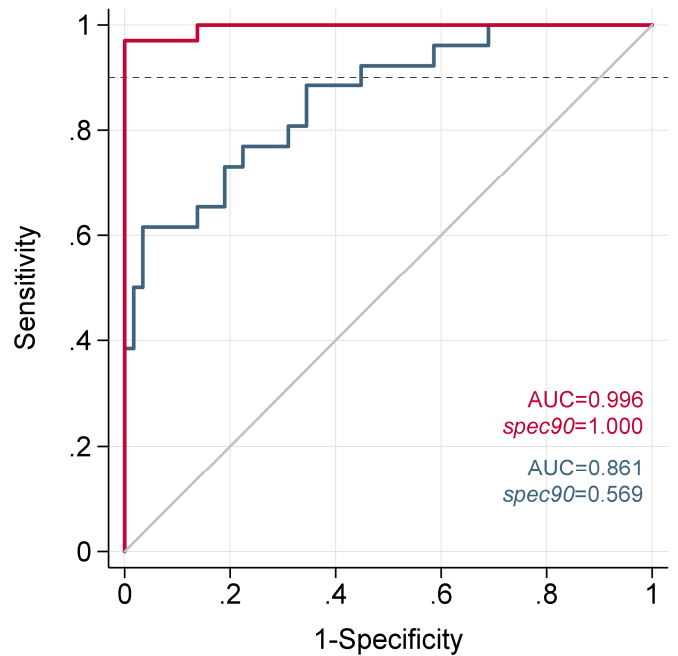

**Figure S6.** Spearman correlation analysis of lipid concentrations in paired ascites and plasma specimens isolated from 15 patients with late-stage OC. Correlation coefficients ( $\rho$ ) plotted for >500 individual lipid species analyzed (gray:  $|\rho| < 0.2$ , blue:  $|\rho| \geq 0.2$ ). 16 metabolites with  $P_{\rho} < 0.05$  are marked (\*).

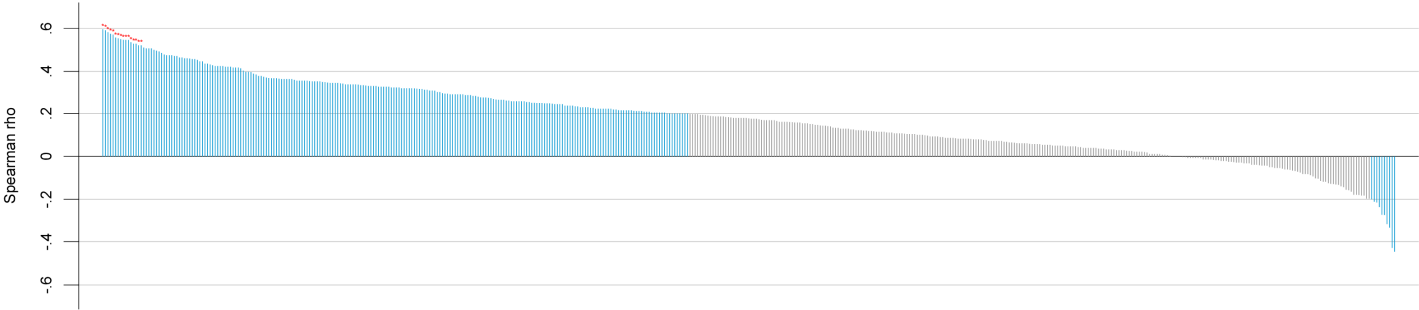

**Figure S7. Schematic summary.** Relative differences in plasma lipid metabolite levels and tissue gene expression levels in women with malignant, versus benign, adnexal mass.

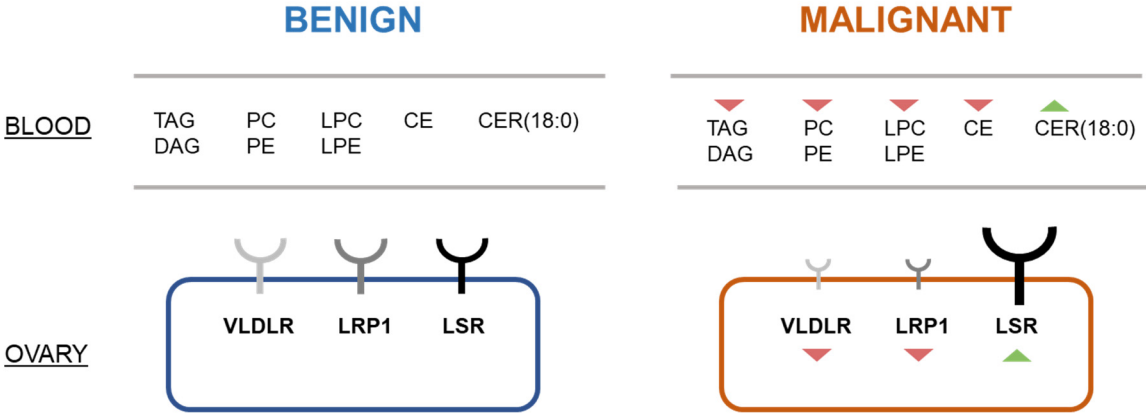

Supplement: 41598_2021_97433_MOESM1_ESM.pdf [file 41598_2021_97433_MOESM1_ESM.pdf]
